# Supplementary material for: Association of Metabolomic Biomarkers with Sleeve Gastrectomy Weight Loss Outcomes
Source: Metabolites. 2023 Mar 31;13(4):506. doi: 10.3390/metabo13040506 (PMC10145663; doi:10.3390/metabo13040506)
Supplement: Supplementary file 1 [file metabolites-13-00506-s001.zip]

Archive with 15 entries (15 files):
- 1-Figure 1.pdf
- 3-Figure 3.pdf
- Supplementary Figure 1.docx
- Supplementary Figure 2.docx
- Supplementary Figure 3.docx
- Supplementary Information Methods.pdf
- Supplementary Table 1.docx
- Supplementary Table 2.docx
- Supplementary Table 3.docx
- Supplementary Table 4.docx
- Supplementary Table 5.docx
- Supplementary Table 6.docx
- Supplementary Table 7.docx
- Supplementary Table 8.docx
- Supplementary Table 9.docx
