# Supplementary figures and images for: Association of Metabolomic Biomarkers with Sleeve Gastrectomy Weight Loss Outcomes
Source: MDPI journal article supplement (doi:10.3390/metabo13040506), 2023-03-31

A

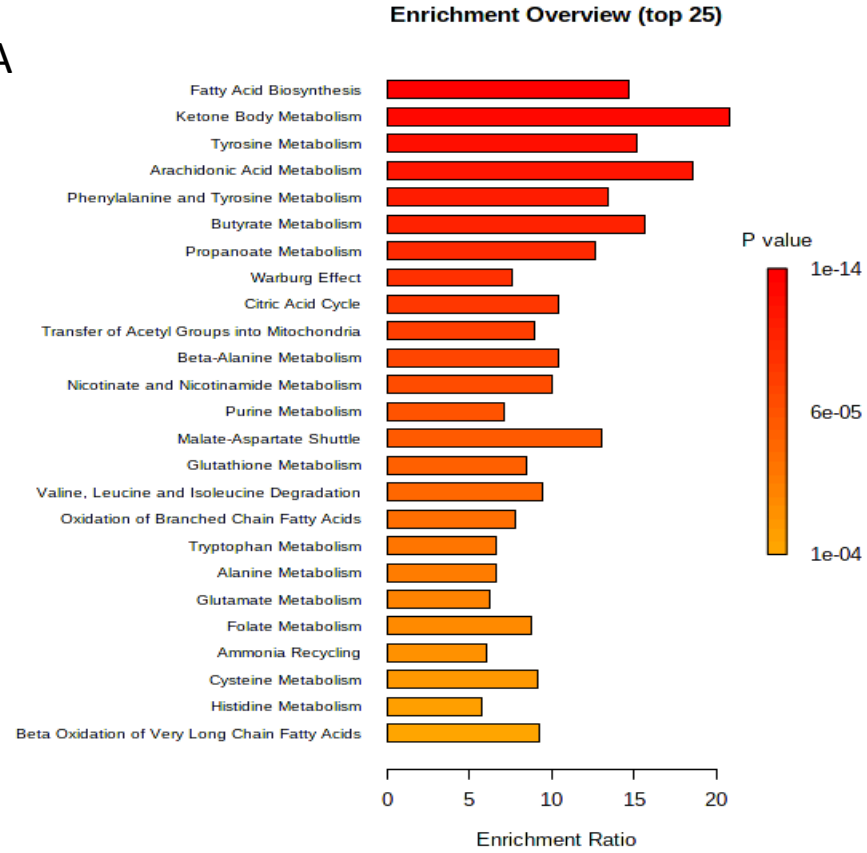

B

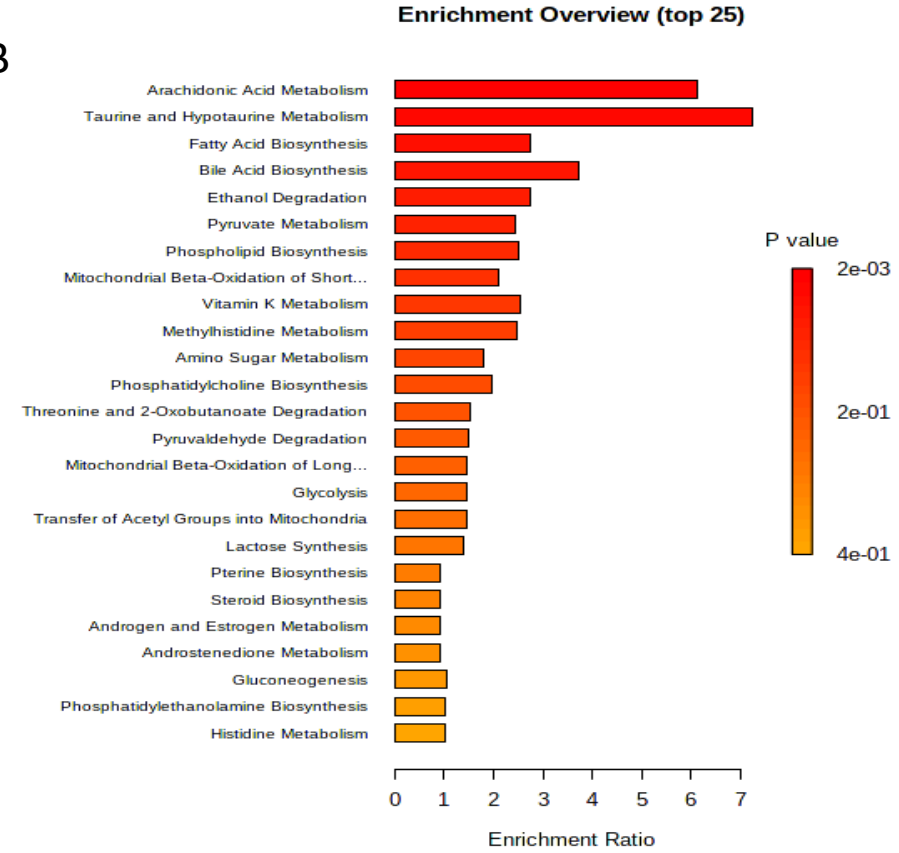

Supplement: s1 [file s1]

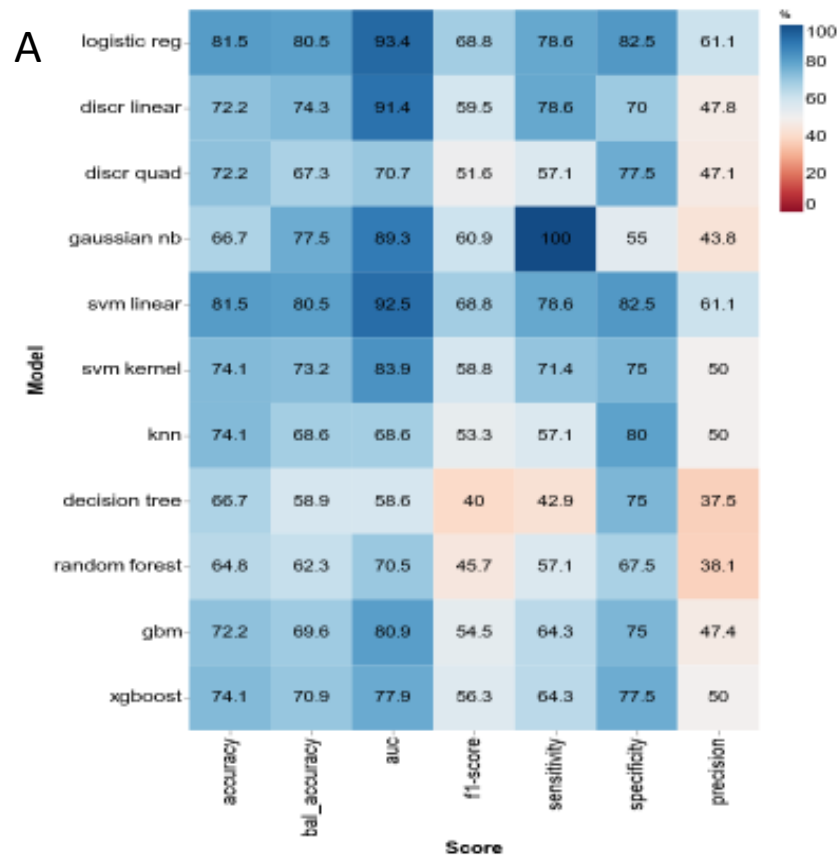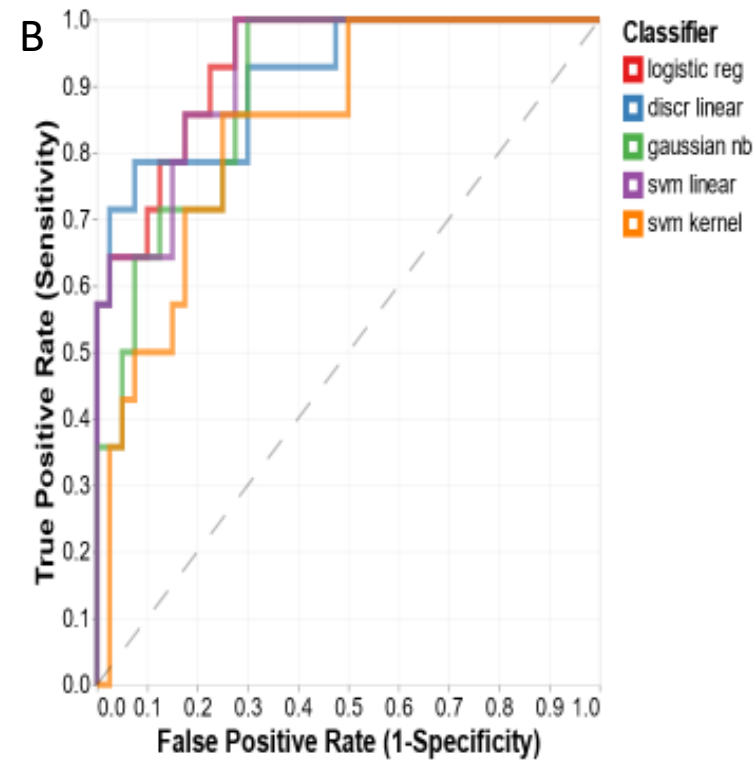

Supplement: s1 [file s1]
